# Supplementary material for: Extracellular Vesicles from Human Advanced-Stage Prostate Cancer Cells Modify the Inflammatory Response of Microenvironment-Residing Cells
Source: PubMed Central journal article supplement (PMC6769894; doi:10.3390/cancers11091276), 2019-08-30
Supplement: cancers-11-01276-s001.pdf [file cancers-11-01276-s001.pdf]

# Supplementary Materials: Extracellular Vesicles from Human Advanced-Stage Prostate Cancer Cells Modify the Inflammatory Response of Microenvironment-Residing Cells

Letizia Mezzasoma, Egidia Costanzi, Paolo Scarpelli, Vincenzo Nicola Talesa and Ilaria Bellezza

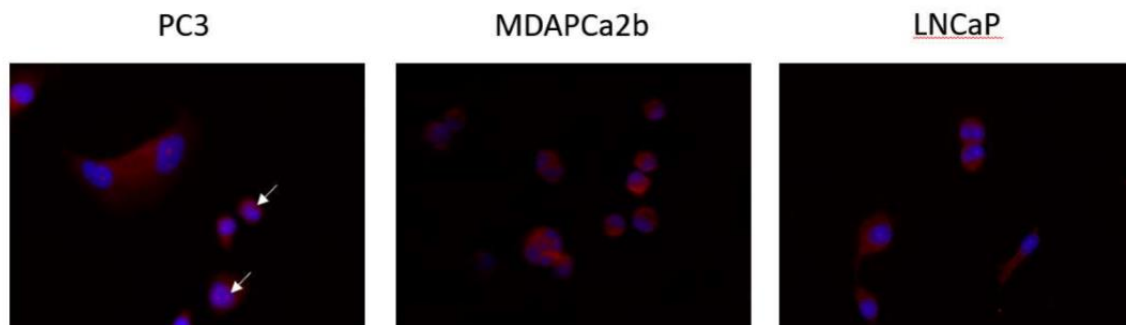

**Figure S1.** Nuclear localization of NF- $\kappa$ B. PC3, MDAPCa2B and LNCaP cells were fixed and used for the detection of NF- $\kappa$ B. Nuclei were counterstained with DAPI. The images are representative of one out of three separate experiments. Magnification 40  $\times$ .

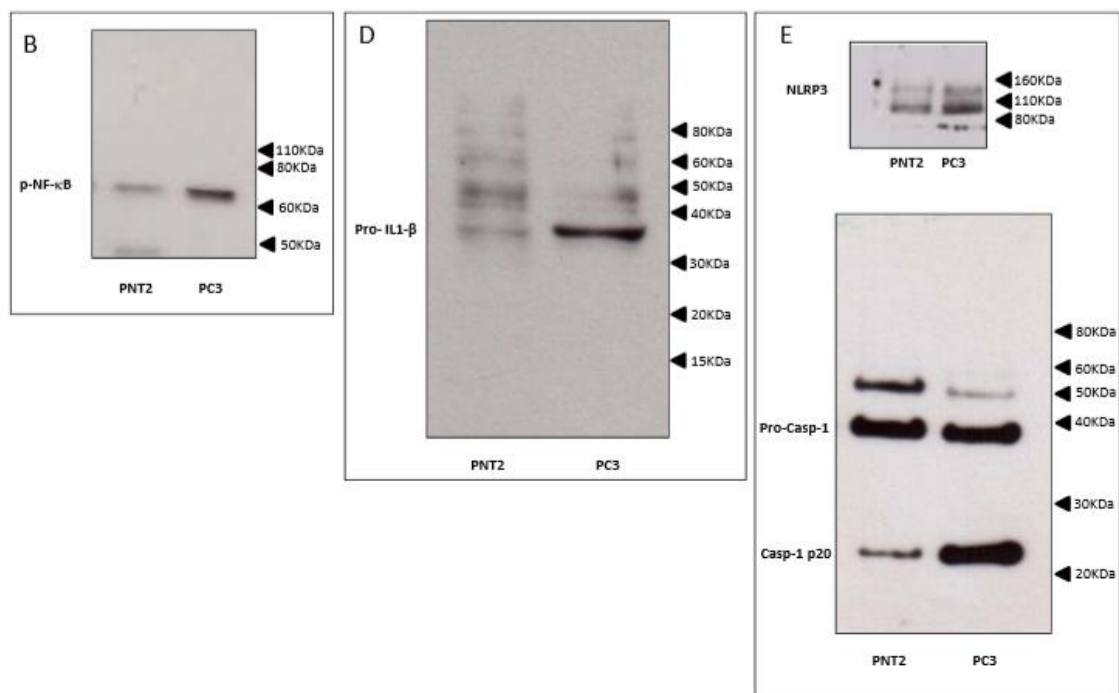

**Figure S2.** Whole blots reported in Figure.2.

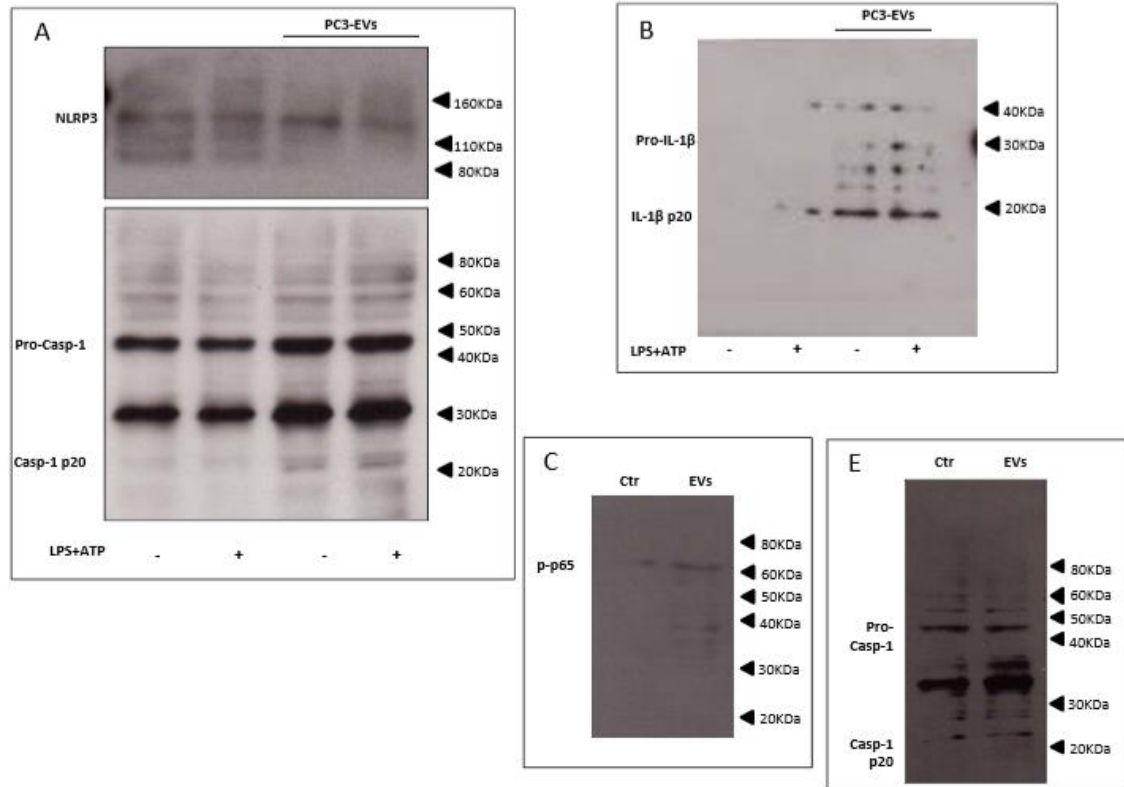

Figure S3. Whole blots reported in Figure.3.

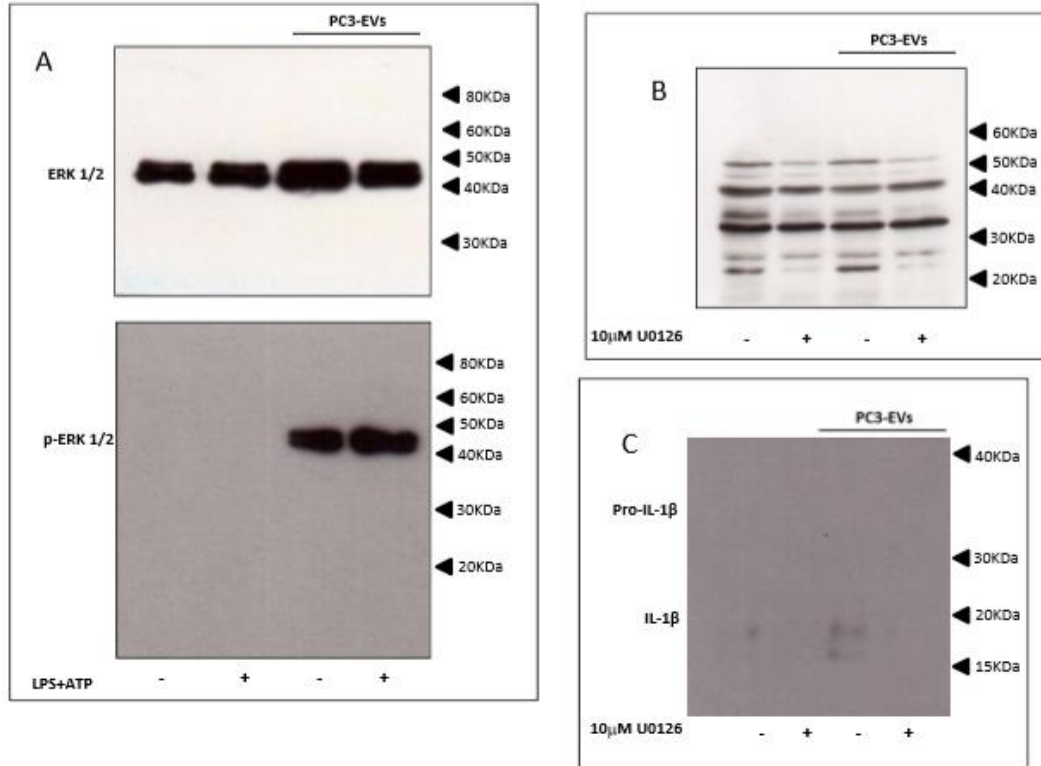

Figure S4. Whole blots reported in Figure.4.

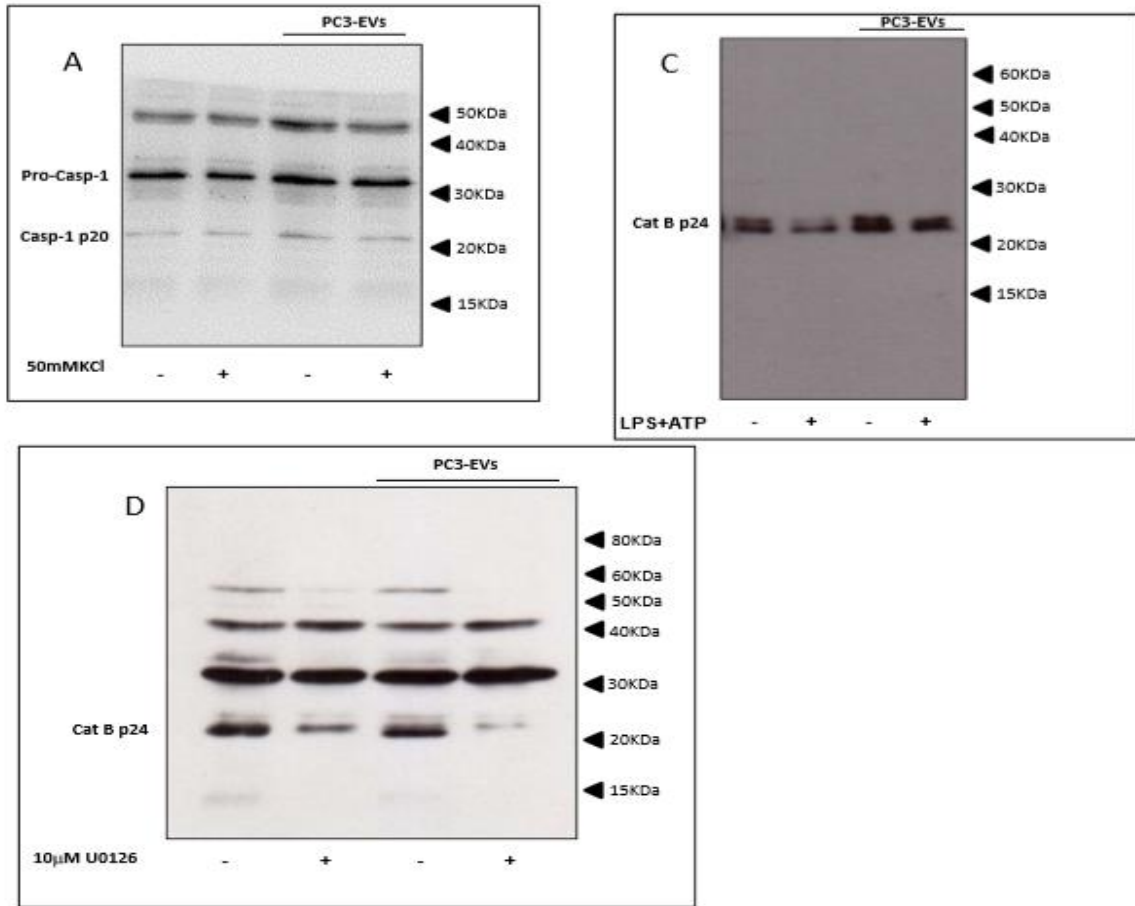

Figure S5. Whole blots reported in Figure.5.

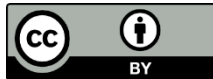

© 2019 by the authors. Licensee MDPI, Basel, Switzerland. This article is an open access article distributed under the terms and conditions of the Creative Commons Attribution (CC BY) license (<http://creativecommons.org/licenses/by/4.0/>).
